# Supplementary material for: Single-cell and multi-omic characterization of ex vivo expanded ASTRLs from stable kidney transplant recipients reveals a regulatory T cell phenotype
Source: Research Square preprint supplement (doi:10.21203/rs.3.rs-7464625/v1), 2025-09-25
Supplement: Supplementary file 1 [file 7d3679d7cde3fe678c5041ad.pdf]

Supplementary Figure 1. Clonal Expansion in the B cell clusters of 5 PBMC samples and the respective ASTRs.

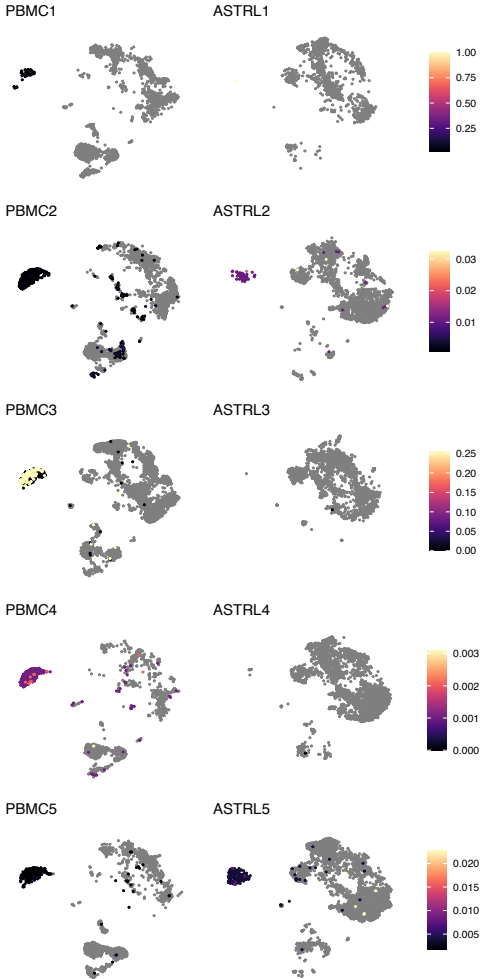

Supplementary Table 1. CyTOF antibody marker panel

| <b>Metal</b> | <b>Marker</b>              |
|--------------|----------------------------|
| 149Sm        | CD25                       |
| 145Nd        | CD4                        |
| 154Sm        | CD3                        |
| 162Dy        | FoxP3                      |
| 148Nd        | CD16                       |
| 161Dy        | CD152 (CTLA-4)             |
| 175Lu        | CD278/ICOS                 |
| 174Yb        | CD279 (PD-1)               |
| 147Sm        | LAP                        |
| 111Cd        | CD155                      |
| 152Sm        | CD112                      |
| 209Bi        | TIGIT                      |
| 167Er        | CD197 (CCR7)               |
| 163Dy        | CD183 (CXCR3)              |
| 141Pr        | CD196 (CCR6)               |
| 142Nd        | CD19                       |
| 172Yb        | CD38                       |
| 150Nd        | CD24                       |
| 155Gd        | CD27                       |
| 144Nd        | CD11b (Mac-1)              |
| 164Dy        | helios                     |
| 166Er        | IL-10                      |
| 153Eu        | CD62L (L-selectin)         |
| 165Ho        | IFNg                       |
| 151Eu        | CD103                      |
| 158Gd        | CD134 (OX40)               |
| 173Yb        | CD203                      |
| 169Tm        | CD304 (Neuropilin-1)       |
| 194Pt        | CD45                       |
| 113Cd        | CD85k (ILT3)               |
| 168Er        | CD73 (Ecto-5-nucleotidase) |
| 160Gd        | CD39                       |
| 170Er        | CD45RA                     |
| 156Gd        | GARP                       |
| 159Tb        | CD357 (GITR)               |
| 171Yb        | CD226                      |
| 146Nd        | CD8a                       |
| 176Yb        | CD56 (NCAM)                |
| 143Nd        | CD127 (IL-7Ra)             |
| 103Rh        | Cell-ID Intrcalator        |
|              | Cell-ID Intercalator-Ir    |
