# Supplementary material for: Single-cell and multi-omic characterization of ex vivo expanded ASTRLs from stable kidney transplant recipients reveals a regulatory T cell phenotype
Source: Research Square preprint supplement (doi:10.21203/rs.3.rs-7464625/v1), 2025-09-25
Supplement: Supplementary file 2 [file a6ed9b4d3e2c69c8be1ebccc.docx]

Supplementary Figure 1. Clonal Expansion in the B cell clusters of 5 PBMC samples and the respective ASTRLs.

| **Metal** | **Marker** |
| --- | --- |
| 149Sm | CD25 |
| 145Nd | CD4 |
| 154Sm | CD3 |
| 162Dy | FoxP3 |
| 148Nd | CD16 |
| 161Dy | CD152 (CTLA-4) |
| 175Lu | CD278/ICOS |
| 174Yb | CD279 (PD-1) |
| 147Sm | LAP |
| 111Cd | CD155 |
| 152Sm | CD112 |
| 209Bi | TIGIT |
| 167Er | CD197 (CCR7) |
| 163Dy | CD183 (CXCR3) |
| 141Pr | CD196 (CCR6) |
| 142Nd | CD19 |
| 172Yb | CD38 |
| 150Nd | CD24 |
| 155Gd | CD27 |
| 144Nd | CD11b (Mac-1) |
| 164Dy | helios |
| 166Er | IL-10 |
| 153Eu | CD62L (L-selectin) |
| 165Ho | IFNg |
| 151Eu | CD103 |
| 158Gd | CD134 (OX40) |
| 173Yb | CD203 |
| 169Tm | CD304 (Neuropilin-1) |
| 194Pt | CD45 |
| 113Cd | CD85k (ILT3) |
| 168Er | CD73 (Ecto-5-nucleotidase) |
| 160Gd | CD39 |
| 170Er | CD45RA |
| 156Gd | GARP |
| 159Tb | CD357 (GITR) |
| 171Yb | CD226 |
| 146Nd | CD8a |
| 176Yb | CD56 (NCAM) |
| 143Nd | CD127 (IL-7Ra) |
| 103Rh | Cell-ID Intrcalator |
|  | Cell-ID Intercalator-Ir |

Supplementary Table 1. CyTOF antibody marker panel
